# Supplementary material
Source: MDPI journal article supplement (https://www.mdpi.com/2073-4433/13/10/1685)
Supplement: s1 [file s1]

# Supplementary Materials: PM<sub>2.5</sub> Source Apportionment and Implications for Particle Hygroscopicity at an Urban Background Site in Athens, Greece

Evangelia Diapouli \*, Prodromos Fetfatzis, Pavlos Panteliadis, Christina Spitieri, Maria I. Gini, Stefanos Papagiannis, Vasiliki Vasilatou, and Konstantinos Eleftheriadis

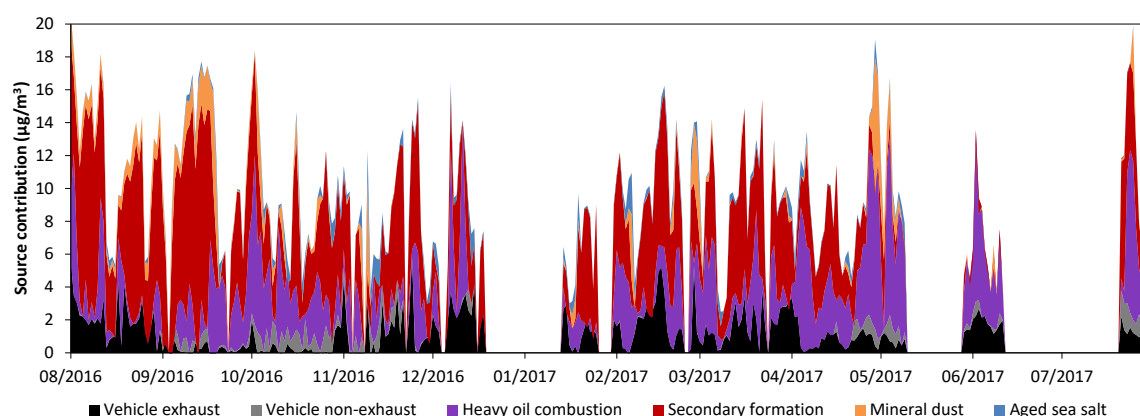

**Figure S1.** Temporal variability of source contributions, obtained through the application of PMF model on PM<sub>2.5</sub> chemical speciation data.
